# Supplementary material for: Factors influencing the photocatalytic hydroamination of alkynes with anilines catalyzed by supported gold nanoparticles under visible light irradiation
Source: Royal Society of Chemistry journal article supplement (doi:10.1039/c6ra01518b), 2016-01-01
Supplement: c6ra01518b1.pdf [file c6ra01518b1.pdf]

Supporting information for

Factors Influencing the Photocatalytic

Hydroamination of Alkynes with Anilines Catalyzed

by Supported Gold Nanoparticles under Visible

Light Irradiation

*Jian Zhao,\* Zhanfeng Zheng, Steven Bottle, Chao Chen, Yiming Huang, Sarina Sarina, Alison  
Chou, Huaiyong Zhu\**

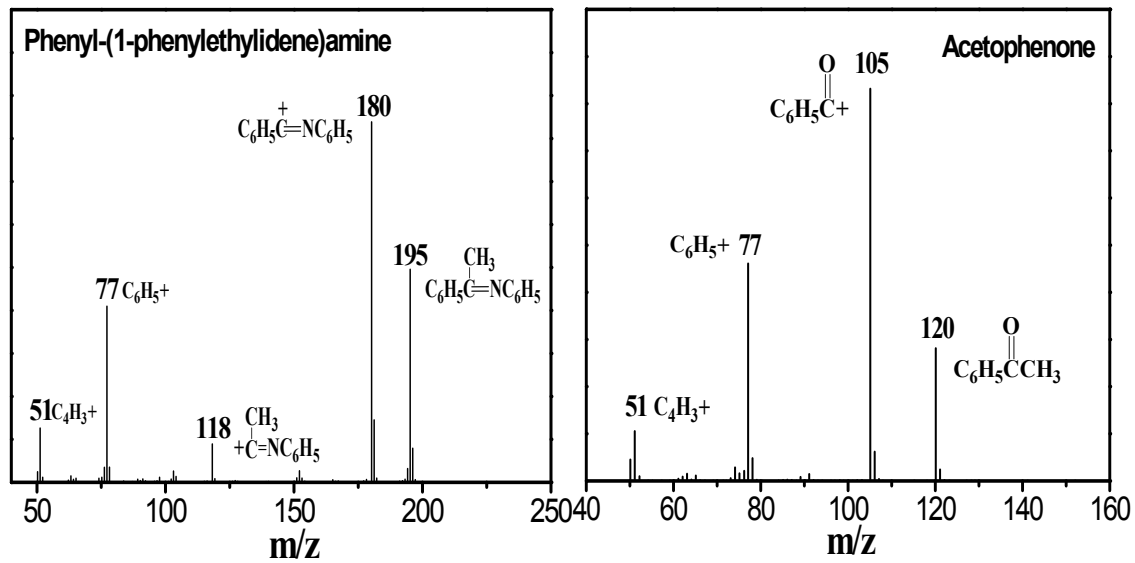

**Figure S1(a).** GC-MS of hydroamination products of phenylacetylene with aniline as example.

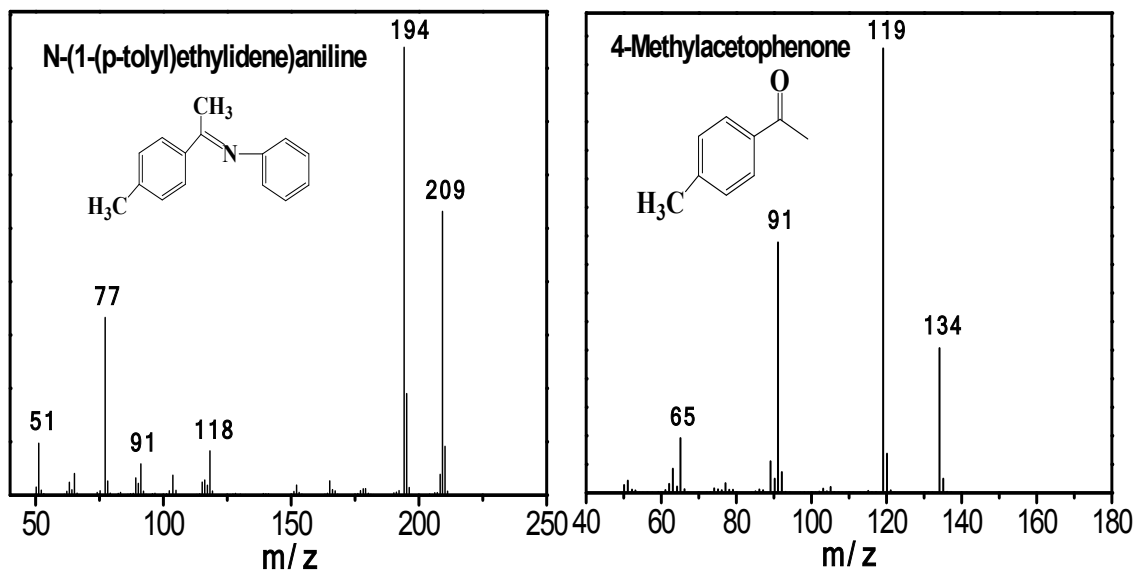

**Figure S1(b).** GC-MS of hydroamination products of 4-ethynyltoluene with aniline as example.

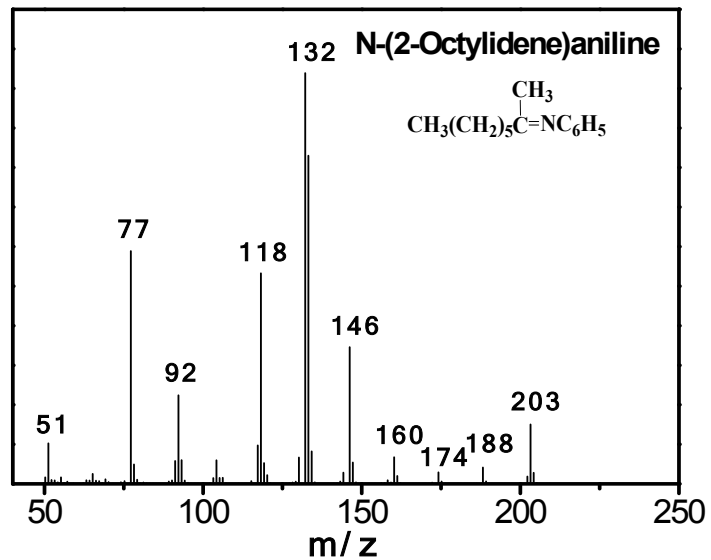

**Figure S1(c).** GC-MS of main product of 1-Octyne with aniline as example.

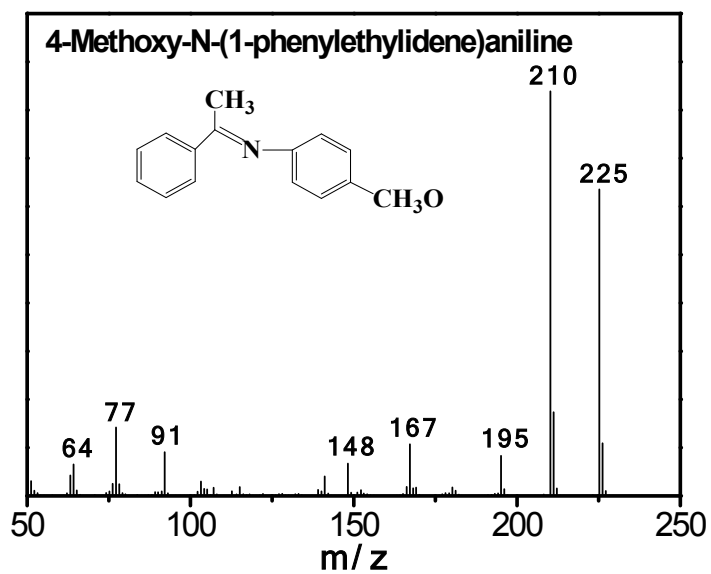

**Figure S1(d).** GC-MS of main product of phenylacetylene with 4-methoxyaniline as example.

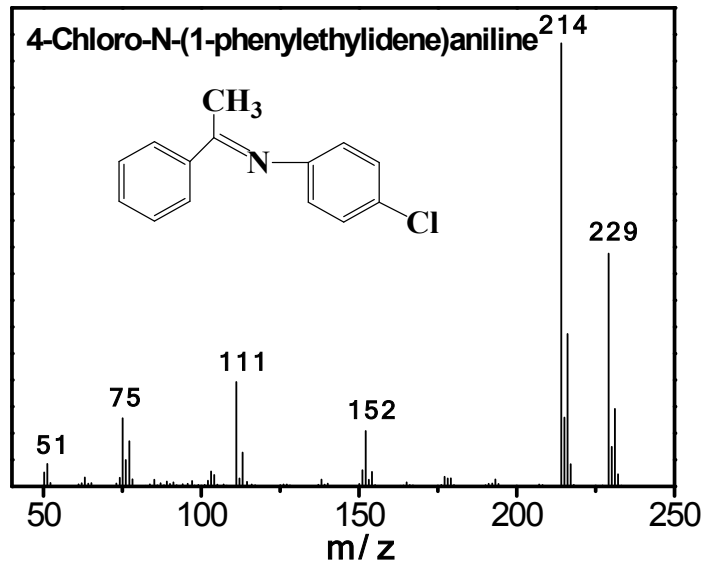

**Figure S1(e).** GC-MS of main product of phenylacetylene with 4-chloroaniline as example

The specific surface area of AuNPs is calculated according to  $S_{Au} \text{ (m}^2\text{/g)} = C_1S_1 + C_2S_2 + \dots + C_nS_n$ .  $S_n$  was obtained from following equation:<sup>1</sup>

$$S_n = \frac{A_n}{m_n} = \frac{4\pi\left(\frac{d_n}{2}\right)^2}{\rho V_n} = \frac{\pi d_n^2}{\rho \cdot \frac{4}{3}\pi\left(\frac{d_n}{2}\right)^3} = \frac{6}{\rho d_n}$$

where  $C_n$  is the ratio of AuNPs with the diameter of  $d_n$ ,  $\rho$  is the density of gold,  $19.30 \text{ g}\cdot\text{cm}^{-3}$ ,  $d_n$  is the diameter of AuNPs in certain range,  $\mu\text{m}$ .

#### Reference

1. Janz, A., Köockritz, A., Yao, L. & Martin, A. Fundamental calculations on the surface area determination of supported gold nanoparticles by alkanethiol adsorption. *Langmuir* 26, 6783-6789 (2010).

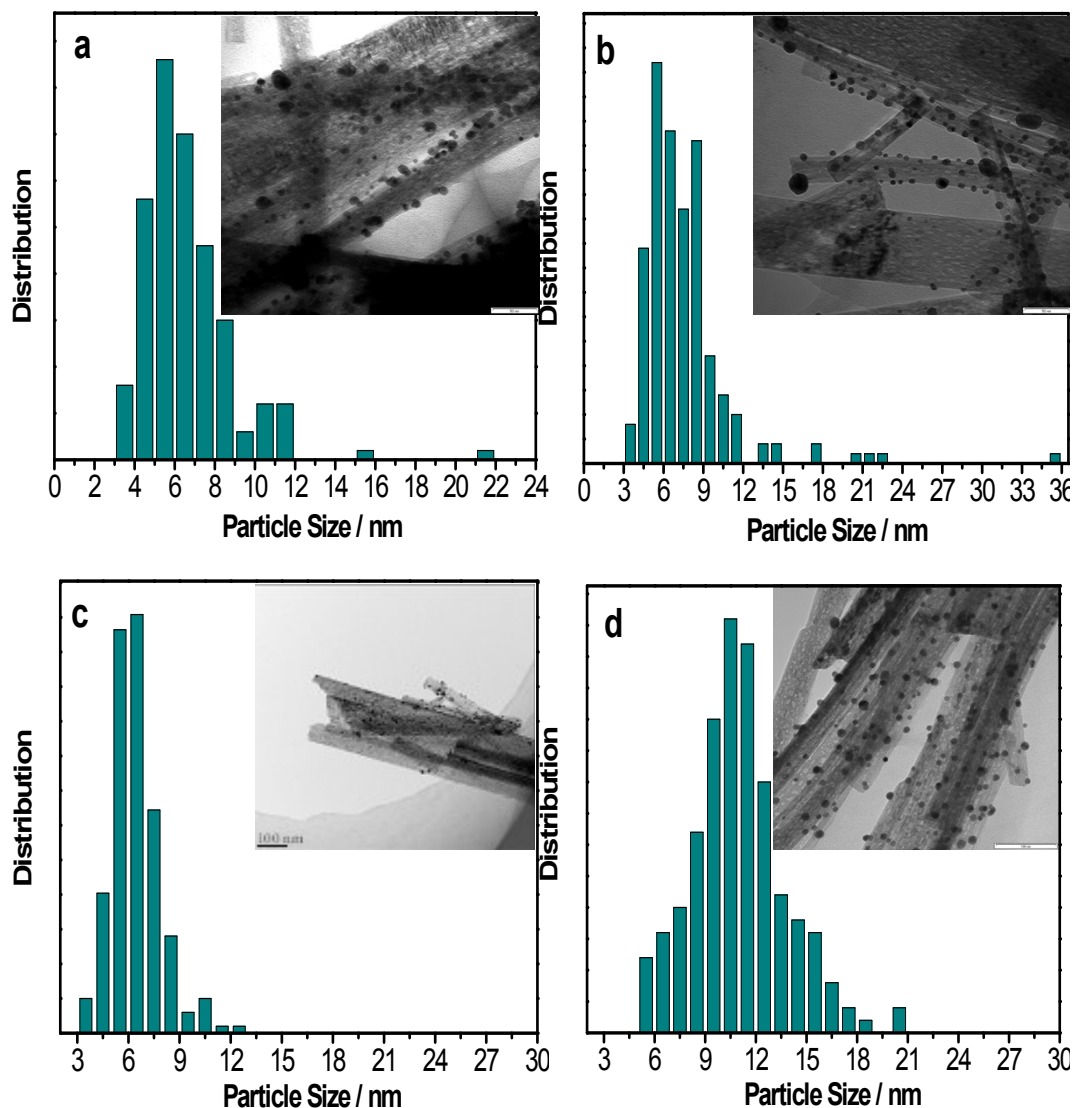

Figure S2. The size distribution of AuNPs on  $\text{TiO}_2(\text{B})$  according to TEM analysis. [a] 2wt% Au/ $\text{TiO}_2(\text{B})$ , 50 nm scale; [b] 2wt% Au/ $\text{TiO}_2(\text{B})$  calcined at 300 °C for 3 h, 50 nm scale; [c] 3wt% Au/ $\text{TiO}_2(\text{B})$ , 100 nm scale; [d] 3wt% Au/ $\text{TiO}_2(\text{B})$  calcined at 400 °C for 12 h, 100 nm scale.

Conversion difference is only 3% for [a] 2wt% Au/ $\text{TiO}_2(\text{B})$  and [b] 2wt% Au/ $\text{TiO}_2(\text{B})$  calcined at 300 °C (size difference of AuNPs 1-2 nm), while 20% for Au/ $\text{TiO}_2(\text{B})$  and Au/ $\text{TiO}_2(\text{B})$  calcined at 400 °C (size difference of AuNPs  $\geq 5$  nm).

**Table S1.** Photocatalytic Hydroamination of 4-phenyl-1-butyne with Aniline by AuNPs on Different Supports<sup>a</sup>.

| Entry | Photocatalysts                    | Conv. (%) <sup>b</sup> | S <sub>I</sub> (%) <sup>c</sup> | S <sub>K</sub> (%) <sup>d</sup> |
|-------|-----------------------------------|------------------------|---------------------------------|---------------------------------|
| 1     | Au/TiO <sub>2</sub> (B)           | 76                     | 94                              | 2                               |
| 2     | Au/TiO <sub>2</sub> (B).N         | 90                     | 91                              | 1                               |
| 3     | Au/TiO <sub>2</sub> (anatase)     | 59                     | 90                              | 5                               |
| 4     | Au/P25                            | 70                     | 95                              | 4                               |
| 5     | Au/ZrO <sub>2</sub>               | 35                     | 95                              | 2                               |
| 6     | Au/CeO <sub>2</sub>               | 0.4                    | 100                             | -                               |
| 7     | Au/Al <sub>2</sub> O <sub>3</sub> | 42                     | 95                              | 1                               |
| 8     | Au/Zeolite Y                      | 10                     | 85                              | 3                               |

<sup>a</sup> Reaction conditions: 0.015 mmol of AuNPs, 4-phenyl-1-butyne (2 mmol), aniline (2 mmol), 2 ml of toluene as solvent, reacted under visible light at 40 °C for 25 h, argon atmosphere. <sup>b</sup> Determined by GC analysis, the mole of imine and ketone/mole of left alkyne and imine. <sup>c</sup> S<sub>I</sub> = Selectivity for the imine. <sup>d</sup> S<sub>K</sub> = Selectivity for the ketone.
